# Supplementary material for: Acanthosis nigricans as a clinical marker of insulin resistance among overweight adolescents
Source: PubMed Central journal article supplement — Ann Pediatr Endocrinol Metab. 2019 Jun 30;24(2):99–103. doi: 10.6065/apem.2019.24.2.99 (PMC6603613; doi:10.6065/apem.2019.24.2.99), 2019-06-30
Supplement: apem-2019-24-2-99-supplementary.pdf [file apem-2019-24-2-99-supplementary.pdf]

**Supplementary Table 1. Burke's scale for acanthosis nigricans (adapted)**

| Location       | Score | Description                                                                                                                                                                                      |
|----------------|-------|--------------------------------------------------------------------------------------------------------------------------------------------------------------------------------------------------|
| Neck severrity | 0     | Absent: Not detectable on close inspection.                                                                                                                                                      |
|                | 1     | Present: Clearly present on close visual inspection, not visible to the casual observer, extent not measurable.                                                                                  |
|                | 2     | Mild: Limited to the base of the skull, does not extend to the lateral margins of the neck (usually <7.6 cm in breath).                                                                          |
|                | 3     | Moderate: Extending to the lateral margins of the neck (posterior border of the sternocleidomastoid) (usually 7.6–15.2 cm), should not be visible when the participant is viewed from the front. |
|                | 4     | Severe: Extending anteriorly (>15.2 cm), visible when the participant is viewed from the front.                                                                                                  |
| Axilla         | 0     | Absent: Not detectable on close inspection.                                                                                                                                                      |
|                | 1     | Present: Clearly present on close visual inspection, not visible to the casual observer, extent not measurable.                                                                                  |
|                | 2     | Mid: Localized to the central portion of the axilla, may have gone unnoticed by the participant.                                                                                                 |
|                | 3     | Moderate: Involving entire axillary fossa, but not visible when the arm is against the participant's side.                                                                                       |
|                | 4     | Severe: Visible from front or back in the unclothed participant when the arm is against the participant's side.                                                                                  |
| Neck texture   | 0     | Smooth to touch: No differentiation from normal skin to palpation.                                                                                                                               |
|                | 1     | Rough to touch: Clearly differentiated from normal skin.                                                                                                                                         |
|                | 2     | Coarseness can be observed visually, portions of the skin clearly raised a bove other areas.                                                                                                     |
|                | 3     | Extremely coarse: "Hills and valleys" observable on visual examination.                                                                                                                          |
| Knuckles       | 0     | Absent                                                                                                                                                                                           |
|                | 1     | Present                                                                                                                                                                                          |
| Elbows         | 0     | Absent                                                                                                                                                                                           |
|                | 1     | Present                                                                                                                                                                                          |
| Knees          | 0     | Absent                                                                                                                                                                                           |
|                | 1     | Present                                                                                                                                                                                          |

**Supplementary Table 2. Cutoff values for insulin and HOMA-IR for defining hyperinsulinemia and insulin resistance**

|                  | Tanner stage | Percentile | Girls   | Boys    | Reference No. |
|------------------|--------------|------------|---------|---------|---------------|
| Insulin (μUI/mL) | I–II         | ≥90th      | 17.8    | 14.0    | 17            |
|                  | III–IV       |            | 22.2    | 17.7    |               |
|                  | V            |            | ≥ 15.05 | ≥ 15.05 | 18            |
| HOMA-IR          | I–II         | ≥90th      | 4.1     | 3.2     | 17            |
|                  | III–IV       |            | 5.0     | 4.2     |               |
|                  | V            |            | ≥ 3.43  | ≥ 3.43  | 18            |

HOMA-IR, insulin resistance assessment.
